# Supplementary material
Source: publisher figshare collection journal article supplement (https://acs.figshare.com/ndownloader/files/12393521)
Supplement: Supplementary file 1 [file 12393521]

# **SUPPORTING INFORMATION**

Napabucasin and Related Heterocycle-Fused Naphthoquinones as STAT3 Inhibitors  
with Antiproliferative Activity against Cancer Cells

Hauke Löcken, Cinzia Clamor, and Klaus Müller\*

Institute of Pharmaceutical and Medicinal Chemistry, PharmaCampus, Westphalian Wilhelms  
University, Corrensstraße 48, D-48149 Münster, Germany

## List of Figures

|                                                                                |   |
|--------------------------------------------------------------------------------|---|
| <b>Figure S1.</b> $^1\text{H}$ NMR spectrum (400 MHz) of <b>5a</b>             | 3 |
| <b>Figure S2.</b> $^{13}\text{C}$ NMR spectrum (101 MHz) of <b>5a</b>          | 3 |
| <b>Figure S3.</b> $^1\text{H}$ NMR spectrum (600 MHz) of <b>5b</b>             | 4 |
| <b>Figure S4.</b> $^{13}\text{C}$ NMR spectrum (151 MHz) of <b>5b</b>          | 4 |
| <b>Figure S5.</b> $^1\text{H}$ NMR spectrum (400 MHz) of <b>7</b>              | 5 |
| <b>Figure S6.</b> $^{13}\text{C}$ NMR spectrum (101 MHz) of <b>7</b>           | 5 |
| <b>Figure S7.</b> Representative Dot-Plots of Annexin V/7-AAD co-stained cells | 6 |

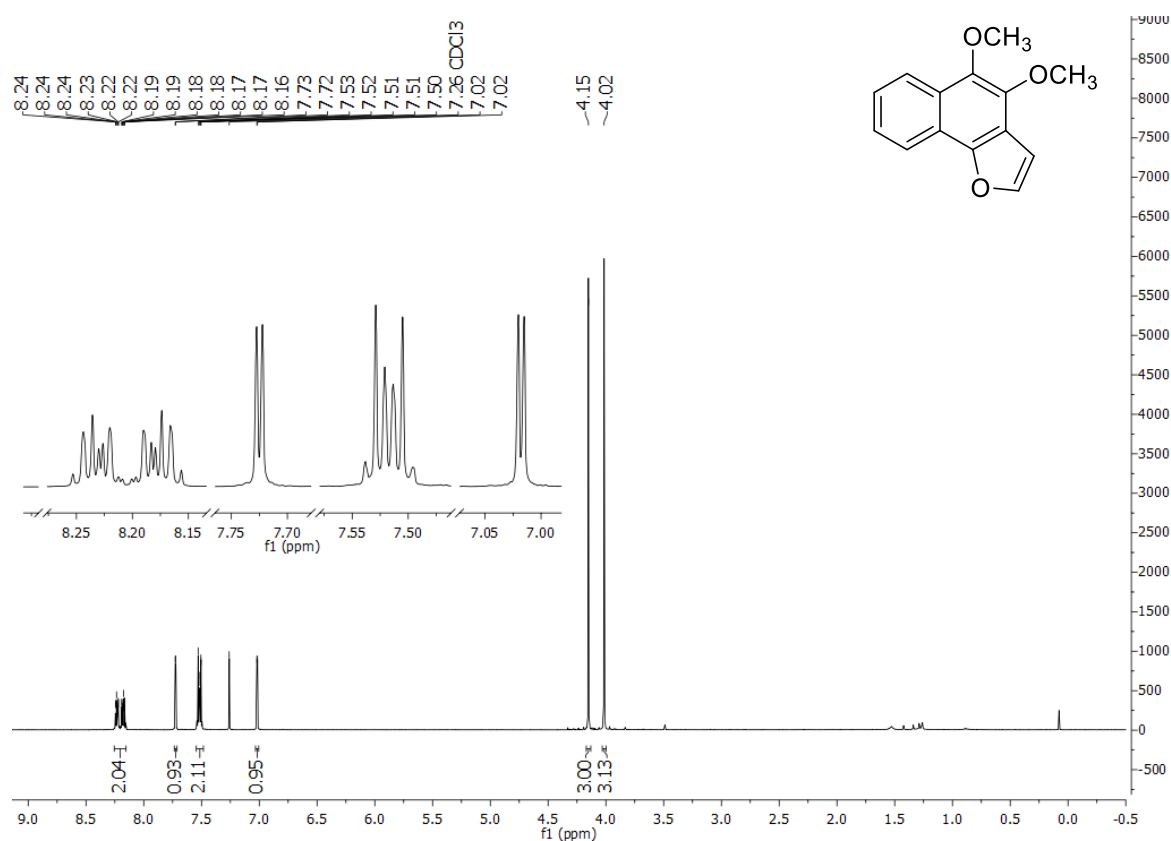

**Figure S1:** <sup>1</sup>H NMR spectrum (400 MHz) of 4,5-Dimethoxynaphtho[1,2-*b*]furan (**5a**) in CDCl<sub>3</sub>.

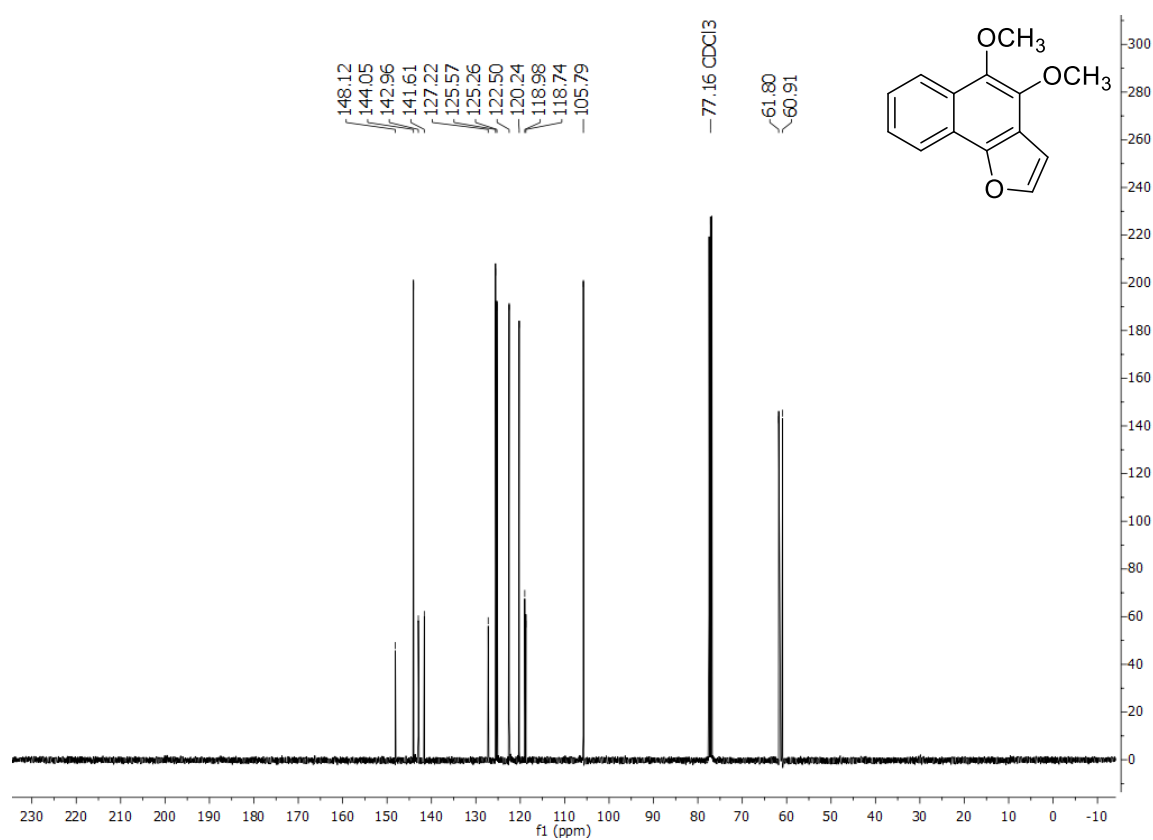

**Figure S2:** <sup>13</sup>C NMR spectrum (101 MHz) of 4,5-Dimethoxynaphtho[1,2-*b*]furan (**5a**) in CDCl<sub>3</sub>.

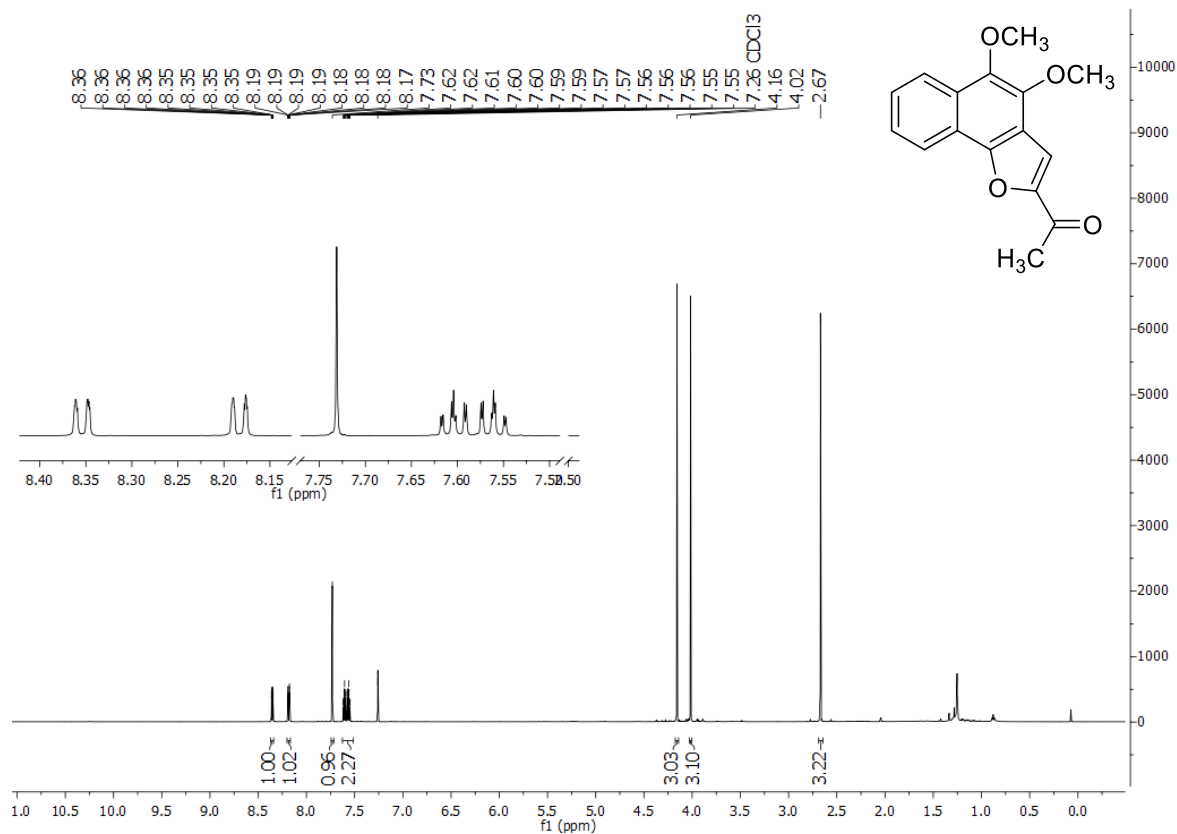

**Figure S3:** <sup>1</sup>H NMR spectrum (600 MHz) of 1-(4,5-Dimethoxynaphtho[1,2-b]furan-2-yl)ethan-1-one (**5b**) in CDCl<sub>3</sub>.

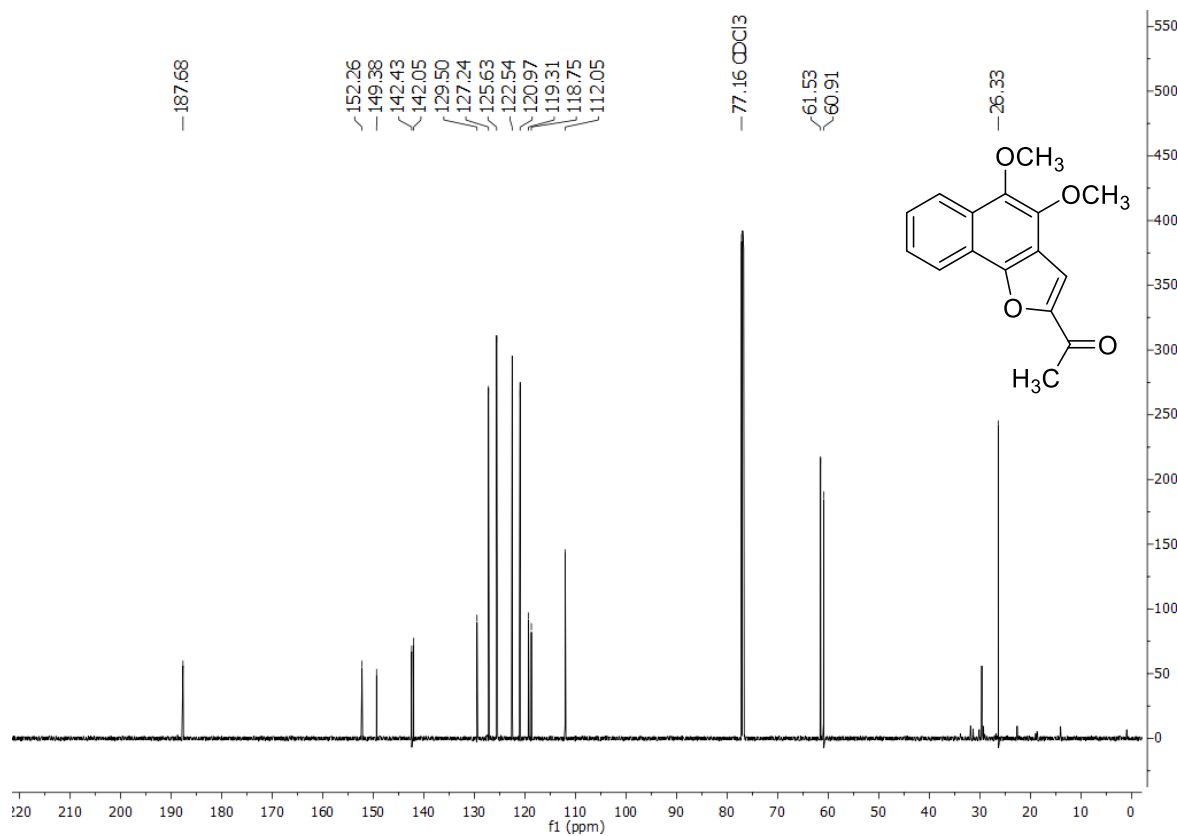

**Figure S4:** <sup>13</sup>C NMR spectrum (151 MHz) of 1-(4,5-Dimethoxynaphtho[1,2-b]furan-2-yl)ethan-1-one (**5b**) in CDCl<sub>3</sub>.

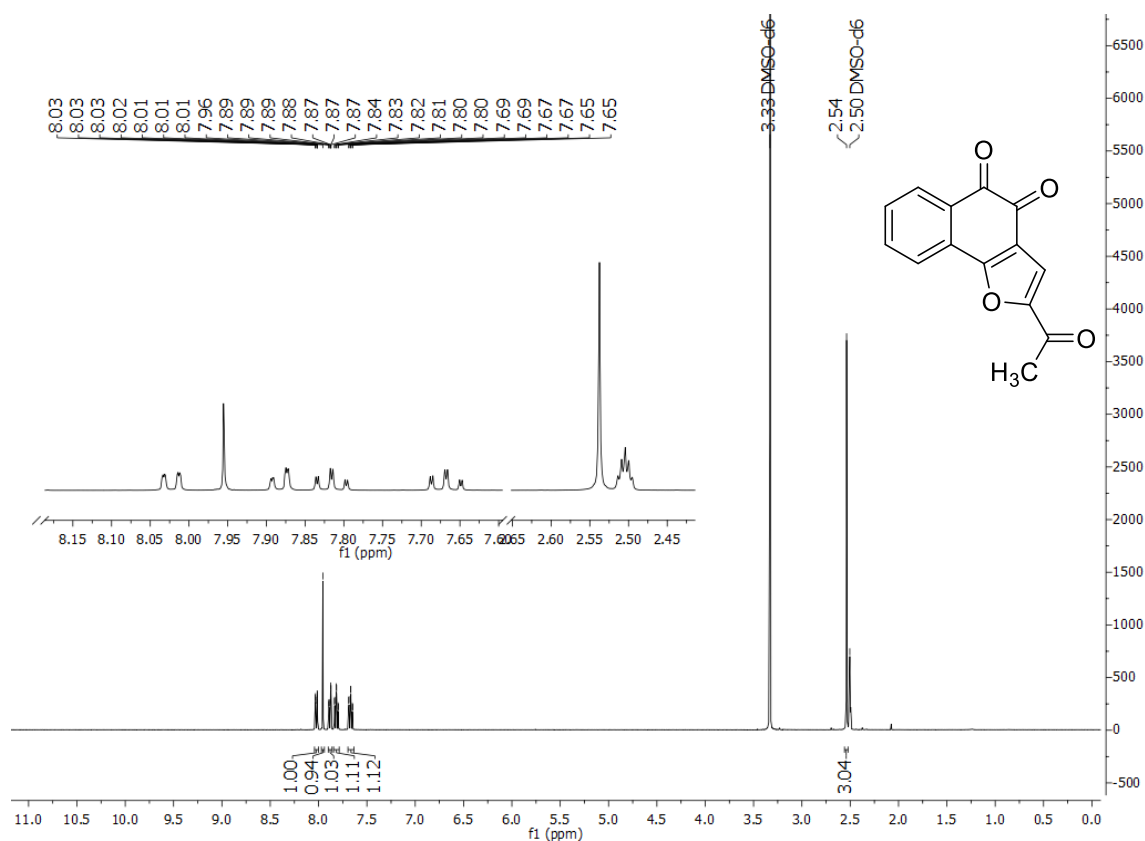

**Figure S5:** <sup>1</sup>H NMR spectrum (400 MHz) of 2-Acetylnaphtho[1,2-*b*]furan-4,5-dione (**7**) in DMSO-*d*<sub>6</sub>.

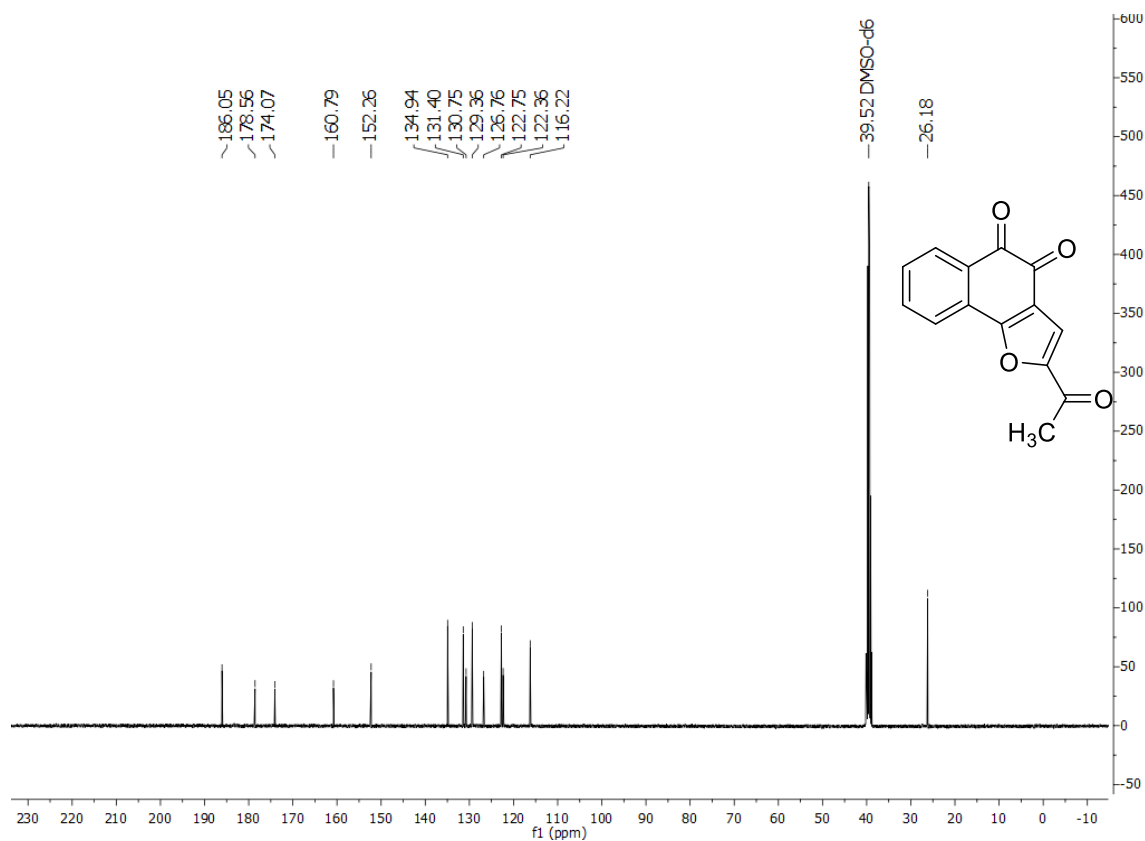

**Figure S6:** <sup>13</sup>C NMR spectrum (101 MHz) of 2-Acetylnaphtho[1,2-*b*]furan-4,5-dione (**7**) in DMSO-*d*<sub>6</sub>.

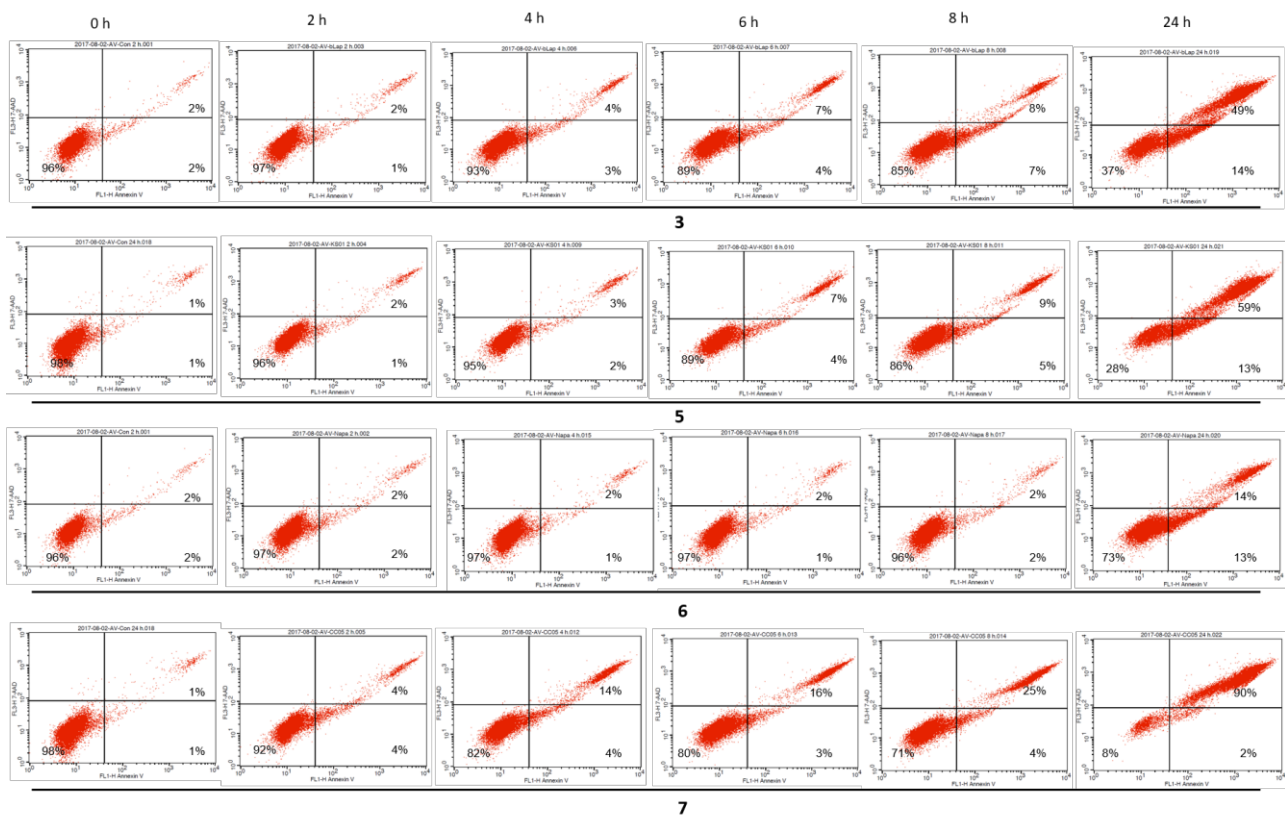

**Figure S7:** Representative Dot-Plots of Annexin V/7-AAD co-stained cells treated with compound 3, 5, 6, and 7 (10 µM) over time.
